# Supplementary material for: Pitavastatin and Atorvastatin Double-Blind Randomized ComPArative Study among HiGh-Risk Patients, Including ThOse with Type 2 Diabetes Mellitus, in Taiwan (PAPAGO-T Study)
Source: PubMed Central journal article supplement (PMC3788128; doi:10.1371/journal.pone.0076298), 2013-10-01

Study 1 of 1 for search of: **Pitavastatin | Taiwan**

← Previous Study [Return to Search Results](#) Next Study →

**Full Text View**

[Tabular View](#)

No Study Results Posted

[Related Studies](#)

## Efficacy and Safety Study of Pitavastatin and Atorvastatin in High Risk Hypercholesterolemic Patients

**This study is not yet open for participant recruitment.**

Verified on June 2011 by Tai Tien Pharmaceuticals Co., Ltd.

First Received on June 29, 2011. Last Updated on June 30, 2011 [History of Changes](#)

|                                       |                                    |
|---------------------------------------|------------------------------------|
| <b>Sponsor:</b>                       | Tai Tien Pharmaceuticals Co., Ltd. |
| <b>Information provided by:</b>       | Tai Tien Pharmaceuticals Co., Ltd. |
| <b>ClinicalTrials.gov Identifier:</b> | NCT01386853                        |

### ▶ Purpose

This is a 12-week, randomized, multicenter, double-blind, active-controlled, non-inferiority study (TATPITA20101005) to compare the efficacy and safety of **pitavastatin** (**Livalo®**) and atorvastatin (Lipitor®) in high risk hypercholesterolemic patients.

| <a href="#">Condition</a> | <a href="#">Intervention</a>                    | <a href="#">Phase</a> |
|---------------------------|-------------------------------------------------|-----------------------|
| Hyperlipidemia            | Drug: <b>Pitavastatin</b><br>Drug: Atorvastatin | Phase III             |

Study Type: Interventional  
Study Design: Allocation: Randomized  
Endpoint Classification: Safety/Efficacy Study  
Intervention Model: Parallel Assignment  
Masking: Double Blind (Subject, Caregiver, Investigator, Outcomes Assessor)  
Primary Purpose: Treatment

Official Title: A 12-week, Randomized, Multicenter, Double-blind, Active-controlled, Non-inferiority Study to Compare the Efficacy and Safety of **Pitavastatin** and Atorvastatin in High Risk Hypercholesterolemic Patients

### Resource links provided by NLM:

[Drug Information](#) available for: [Atorvastatin](#) [Atorvastatin calcium](#) [Pitavastatin](#) [NK 104](#)

[U.S. FDA Resources](#)

### Further study details as provided by Tai Tien Pharmaceuticals Co., Ltd.:

Primary Outcome Measures:

- The change of LDL-C [ Time Frame: Baseline to 12 weeks ] [ Designated as safety issue: No ]

Secondary Outcome Measures:

- The proportion of patients achieving LDL-C < 100 mg/dL; the changes of HDL-C, TG, non-HDL-C, Apo A1 and Apo B, fasting plasma glucose, fasting insulin level, insulin resistance by the HOMA-IR, HbA1c, free fatty acid, and ADMA [ Time Frame: Baseline to 4 weeks and 12 weeks ] [ Designated as safety issue: No ]

Estimated Enrollment: 200  
Study Start Date: July 2011  
Estimated Study Completion Date: July 2012

Estimated Primary Completion Date: March 2012 (Final data collection date for primary outcome measure)

| <a href="#">Arms</a>                                                  | <a href="#">Assigned Interventions</a>                            |
|-----------------------------------------------------------------------|-------------------------------------------------------------------|
| Pitavastatin: Experimental<br>Intervention: Drug: <b>Pitavastatin</b> | Drug: <b>Pitavastatin</b><br>2 mg QD<br>Other Name: <b>Livalo</b> |
| Atorvastatin: Active Comparator<br>Intervention: Drug: Atorvastatin   | Drug: Atorvastatin<br>10 mg QD<br>Other Name: Lipitor             |

## ► Eligibility

Ages Eligible for Study: 20 Years to 75 Years  
 Genders Eligible for Study: Both  
 Accepts Healthy Volunteers: No

### Criteria

#### Inclusion Criteria:

- Patient aged  $\geq 20$  years old and  $< 75$  years old.
- Patient who was eligible and able to participate in the study and accepts to enter the study by signing written informed consent.
- Patient with fasting LDL-C  $> 100$  mg/dL. The concentration of LDL-C is obtained from laboratory examination.
- Patient with at least one of the following description (NCEP ATP III guideline).
- Female patient with child-bearing potential must take reliable contraception method(s) during the participation of the study.

#### Exclusion Criteria:

- Patient who has participated in other investigational studies within 3 months.
- Patient took medication and natural health foods known to alter blood lipid profiles within 4 weeks.
- Patient is taking any medication or food that is prohibited by the study.
- Patient taking Amiodarone will be excluded from this study (due to long half life of this medication).
- Patient is diagnosed with type 1 DM or has been using insulin/insulin analog medication.
- Patient with a history of multiple drug allergies or with a known allergy to HMG-CoA reductase inhibitors.
- Patient with TG  $> 400$  mg/dL.
- Excessive obesity defined as BMI above 35 kg/m<sup>2</sup>.
- Cerebral vascular disease (including cerebrovascular hemorrhage or ischemia, transient ischemic attack) diagnosed within 3 months.
- Myocardial infarction, heart failure (NYHA class III or IV), gross cardiac enlargement (cardiothoracic ratio  $> 0.5$ ), significant heart block or cardiac arrhythmias within 3 months; history of uncontrolled complex ventricular arrhythmias, uncontrolled atrial fibrillation/flutter or uncontrolled supraventricular tachycardia, pacemaker or implantable cardiac device were not eligible for this study.
- Patient with advanced renal disorder (Serum creatinine levels  $\geq 2$  mg/dL and BUN  $\geq 25$  mg/dL).
- Patient with advanced hepatic disorder (AST or ALT level  $\geq 100$  IU/L)
- Patient with CK level  $> 5 \times$  ULRR at any time point between Visit 1 and Visit 2.
- Patient with poorly controlled diabetes mellitus (HbA1c  $> 9.0\%$ ) or patient with severe hypertension ( $> 180$  mmHg for systolic or  $> 120$  mmHg in diastolic blood pressure).
- Patient with hypothyroidism, hereditary muscular disorders, family history of the above or history of drug-induced myopathy.
- Patient has significant alcohol consumption ( $> 65$  mL pure alcohol) within 48 hours before Visit 2.
- Any major surgery within 3 months prior to Visit 2.
- Female patient who is lactating, being pregnant or plans to become pregnant.
- Patient with conditions judged by the investigator as unsuitable for the study.

## ► Contacts and Locations

Please refer to this study by its ClinicalTrials.gov identifier: NCT01386853

### Contacts

Contact: Jasmine Chao +886-27423012 [jasmine@tanabe.com.tw](mailto:jasmine@tanabe.com.tw)

### Locations

#### Taiwan

Changhua Christian Hospital  
Chang-hua, **Taiwan**

National Cheng Kung University Hospital  
Tainan, **Taiwan**

Chang Gung Memorial Hospital-LinKou  
Taipei, **Taiwan**

Tri-Service General Hospital  
Taipei, **Taiwan**

National Taiwan University Hospital  
Taipei, **Taiwan**

Taipei Veterans General Hospital  
Taipei, **Taiwan**

### Sponsors and Collaborators

Tai Tien Pharmaceuticals Co., Ltd.

### Investigators

Principal Investigator: Jaw-Wen Chen, M.D. Ph.D. Taipei Veterans General Hospital, Taipei, Taiwan

### ▶ More Information

No publications provided

Responsible Party: Manager, Development Department  
ClinicalTrials.gov Identifier: [NCT01386853](#) [History of Changes](#)  
Other Study ID Numbers: TATPITA20101005  
Study First Received: June 29, 2011  
Last Updated: June 30, 2011  
Health Authority: Taiwan : Food and Drug Administration

Keywords provided by Tai Tien Pharmaceuticals Co., Ltd.:

Hyperlipidemia  
**Pitavastatin**  
Atorvastatin

Additional relevant MeSH terms:

|                                                |                                                |
|------------------------------------------------|------------------------------------------------|
| <b>Pitavastatin</b>                            | Hypolipidemic Agents                           |
| Hyperlipidemias                                | Antimetabolites                                |
| Dyslipidemias                                  | Molecular Mechanisms of Pharmacological Action |
| Lipid Metabolism Disorders                     | Pharmacologic Actions                          |
| Metabolic Diseases                             | Enzyme Inhibitors                              |
| Atorvastatin                                   | Lipid Regulating Agents                        |
| Hydroxymethylglutaryl-CoA Reductase Inhibitors | Therapeutic Uses                               |
| Anticholesteremic Agents                       |                                                |

ClinicalTrials.gov processed this record on August 23, 2011

---

[Contact Help Desk](#)  
[Lister Hill National Center for Biomedical Communications](#), [U.S. National Library of Medicine](#),  
[U.S. National Institutes of Health](#), [U.S. Department of Health & Human Services](#),  
[USA.gov](#), [Copyright](#), [Privacy](#), [Accessibility](#), [Freedom of Information Act](#)

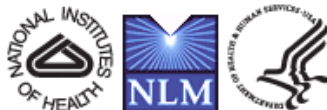

Supplement: pone.0076298.s003.pdf [file pone.0076298.s003.pdf]
